# Supplementary material for: Ephrin B Activate Src Family Kinases in Fibroblasts Inducing Stromal Remodeling in Prostate Cancer
Source: MDPI journal article supplement (doi:10.3390/cancers14092336), 2022-05-09
Supplement: s1 [file s1]

## Supplementary Materials: Ephrin B Activate Src Family Kinases in Fibroblasts Inducing Stromal Remodeling in Prostate Cancer

Mamatha Kakarla, Sathyavathi ChallaSivaKanaka, Mary F. Dufficy, Victoria Gil, Yana Filipovich, Renee Vickman, Susan E. Crawford, Simon W. Hayward and Omar E. Franco \*

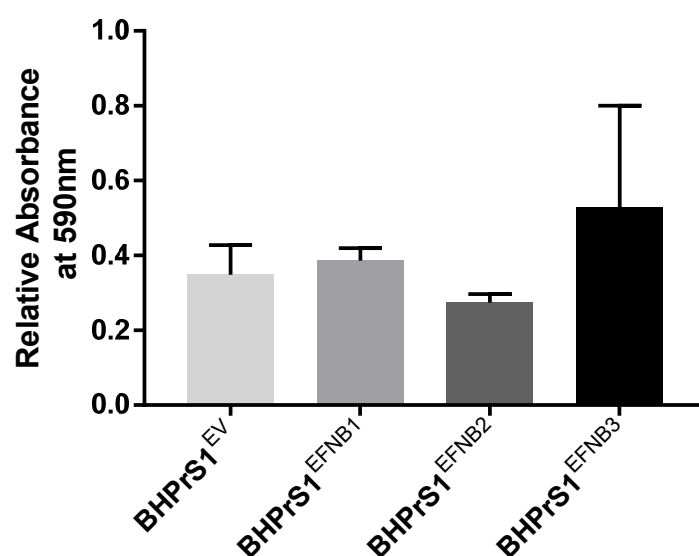

**Figure S1.** Paracrine signals from Ephrin B engineered BHPPrS1 cells effect on LNCaP cell proliferation. LNCaP cells were cultured in the presence of conditioned media from EFNB ligand-expressing BHPPrS1 (BHPPrS1<sup>EFNB1</sup>, BHPPrS1<sup>EFNB2</sup>, BHPPrS1<sup>EFNB3</sup> and BHPPrS1<sup>EV</sup>). After 5 days of exposure, cells were stained with crystal violet and the absorbance at 590 nm quantified. Data is presented as mean  $\pm$  SEM (n=5 independent experiments,  $p > 0.05$ , one-way ANOVA).

S2a

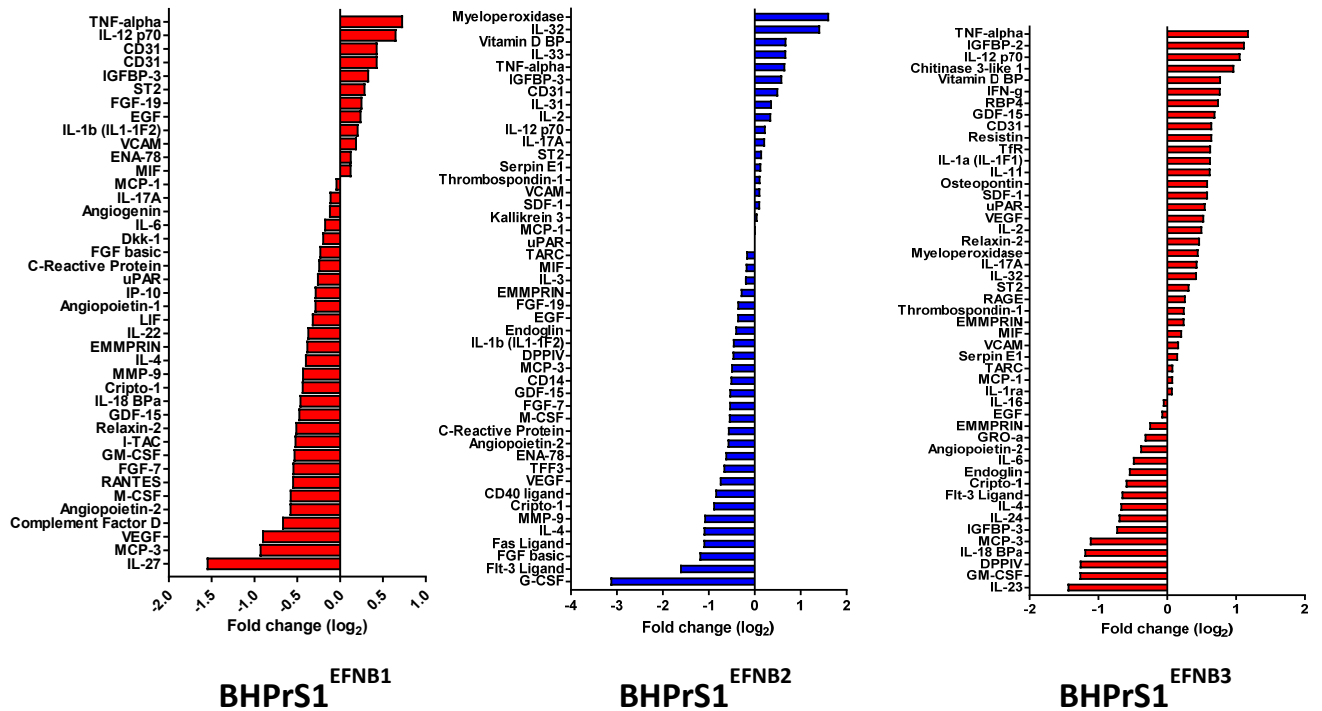

S2b

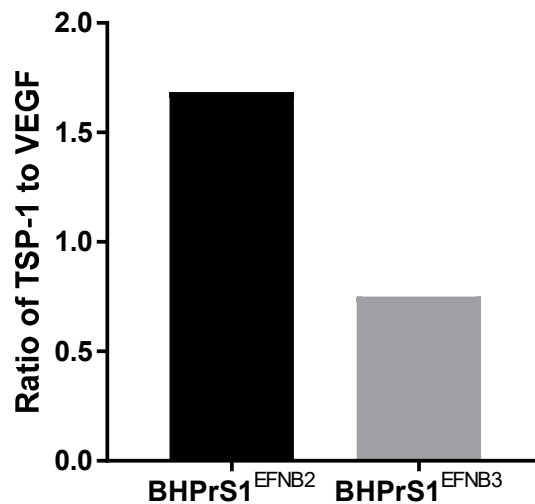

**Figure S2.** Differential secretion of cytokine proteins in the media of normal prostate fibroblasts (BHPPrS1) expressing Ephrin B ligands. a) Log graphs of BHPPrS1<sup>EFNB1</sup>, BHPPrS1<sup>EFNB2</sup>, BHPPrS1<sup>EFNB3</sup> based on the fold change of cytokines that are significantly different compared to BHPPrS1<sup>EV</sup> in the cytokine array (technical replicates =2). b) Ratio of TSP-1 to VEGF is higher in BHPPrS1<sup>EFNB2</sup> compared to BHPPrS1<sup>EFNB3</sup>. TSP-1: Thrombospondin-1; VEGF: Vascular endothelial growth factor.

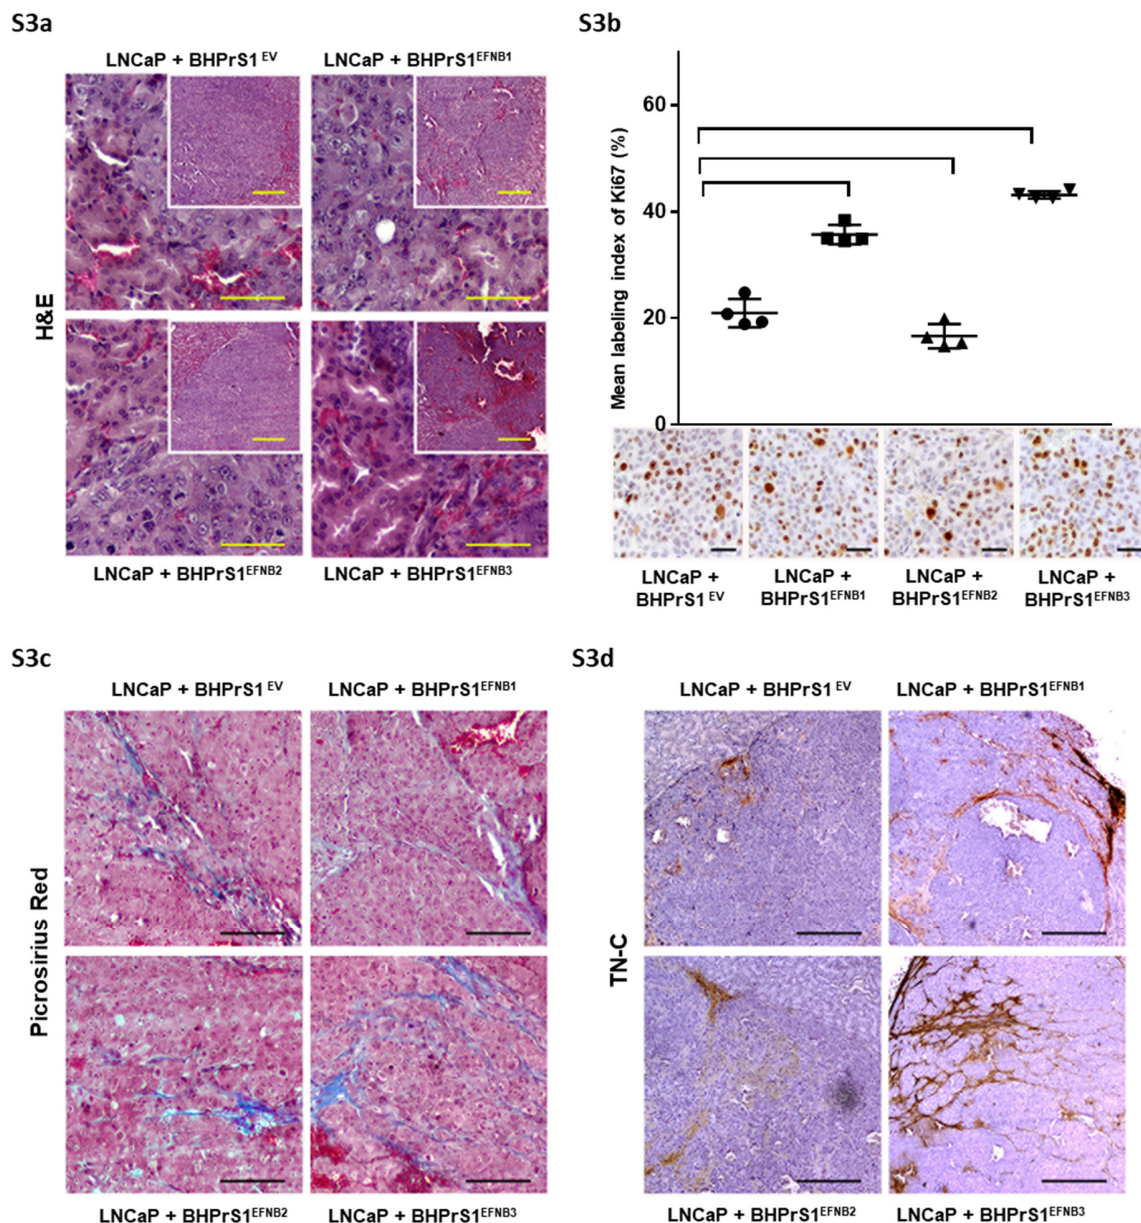

**Figure S3. Increased stromal EFNB1 and EFNB3 induce LNCaP proliferation and TME remodeling in vivo.**

Hematoxylin and eosin (H&E) stained sections of the tumors resulting from grafts of LNCaP with engineered BHPPrS1 cell lines. Grafts of LNCaP with BHPPrS1<sup>EFNB1</sup> and BHPPrS1<sup>EFNB3</sup> showing pronounced inflammatory infiltrates compared to BHPPrS1<sup>EV</sup>. (b) Immunohistochemical (IHC) staining showing pronounced Ki67 expression in LNCaP tumors with BHPPrS1<sup>EFNB1</sup> and BHPPrS1<sup>EFNB3</sup> and reduced Ki67 expression in BHPPrS1<sup>EFNB2</sup> compared to BHPPrS1<sup>EV</sup>. Dot plot showing Ki67 expression quantification (one-way ANOVA). (c) Higher collagen deposition in LNCaP tumor grafts with BHPPrS1<sup>EFNB1</sup> and BHPPrS1<sup>EFNB3</sup> compared to BHPPrS1<sup>EV</sup> as shown by picrosirius red staining (d) ECM remodeling marker tenascin-C (TN-C) is highly expressed in tumor grafts of LNCaP with BHPPrS1<sup>EFNB1</sup> and BHPPrS1<sup>EFNB3</sup> compared to BHPPrS1<sup>EV</sup>. Grafts of LNCaP with BHPPrS1<sup>EFNB2</sup> and BHPPrS1<sup>EV</sup> has relatively lower expressions of TN-C. Scale bar in yellow and black lines represents all pictures were taken at same magnification.

**Figure S4.** Differential protein expression of phosphorylation of a number of kinases in Ephrin B ligands expressing fibroblasts (BHP-rS1). Log graphs of BHP-rS1<sup>EFNB1</sup>, BHP-rS1<sup>EFNB2</sup>, BHP-rS1<sup>EFNB3</sup> phospho kinases based on the fold change of 2 technical replicates compared to BHP-rS1<sup>EV</sup>.

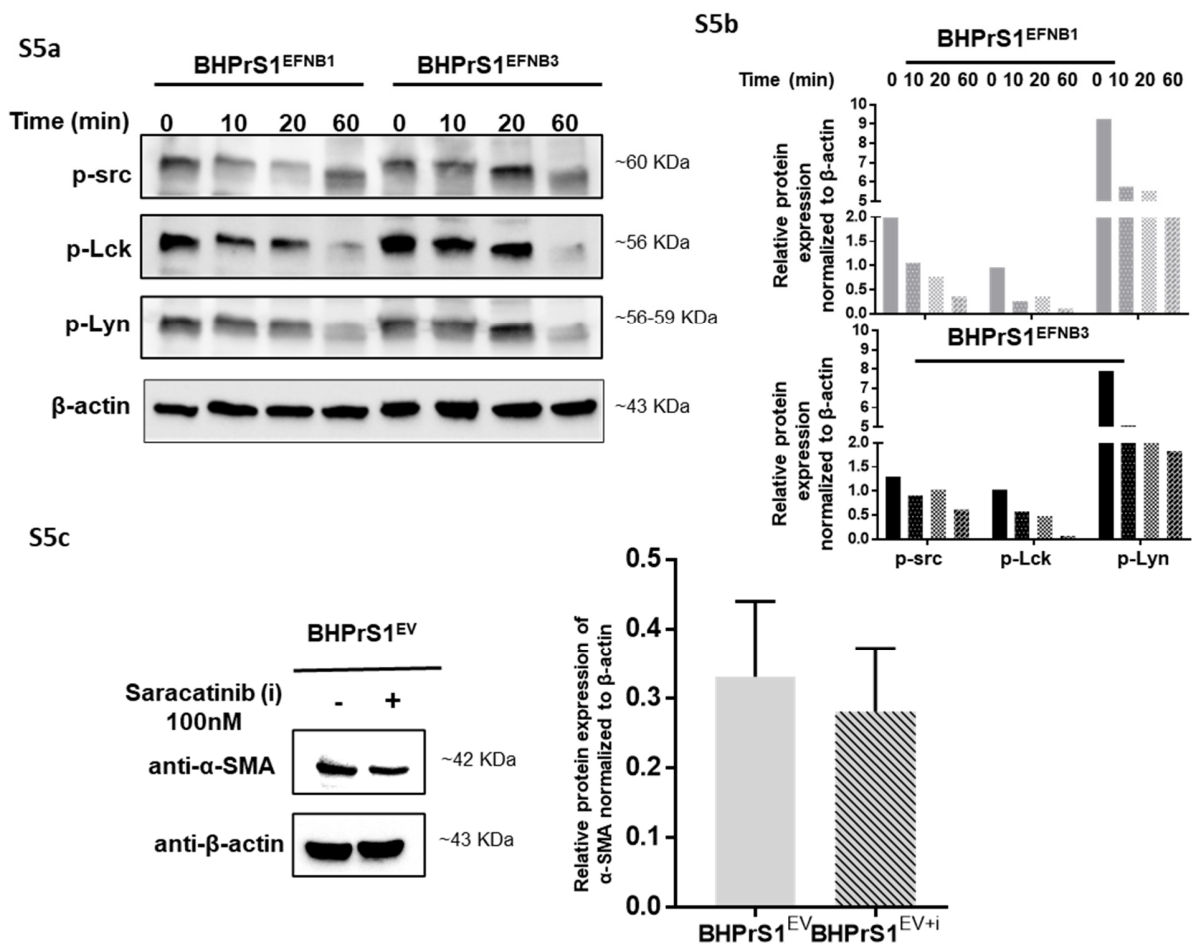

**Figure S5.** Differential expression of phosphor Src family kinases upon inhibition with 100nM Saracatinib. S5a. Western blot of BHPPrS1<sup>EFNB1</sup>, and BHPPrS1<sup>EFNB3</sup> showing reduction in phosphorylation of src, lck and lyn after treatment of saracatinib (100nM) for 0 min, 10 min, 20 min and 60 min (Left). S5b. p-src, p-lck, and p-lyn were quantified and normalized to β-actin and presented as the mean (Right) of one biological experiment. S5c. The protein levels of Alpha-smooth muscle actin (α-SMA) were evaluated in BHPPrS1<sup>EV</sup>, and BHPPrS1<sup>EV</sup> treated with saracatinib inhibitor (100nM) and normalized to β-actin. Data is presented as mean of two independent biological experiments and the error bars represent standard deviation.

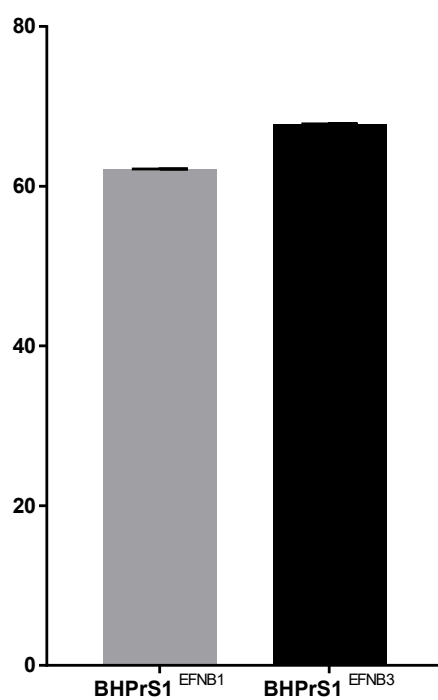

**Figure S6.** mRNA expression of EFNB2 in BHPPrS1<sup>EFNB1</sup>, and BHPPrS1<sup>EFNB3</sup> cell lines. Values are representative of 3 independent experiments and data is presented as mean ± SEM.



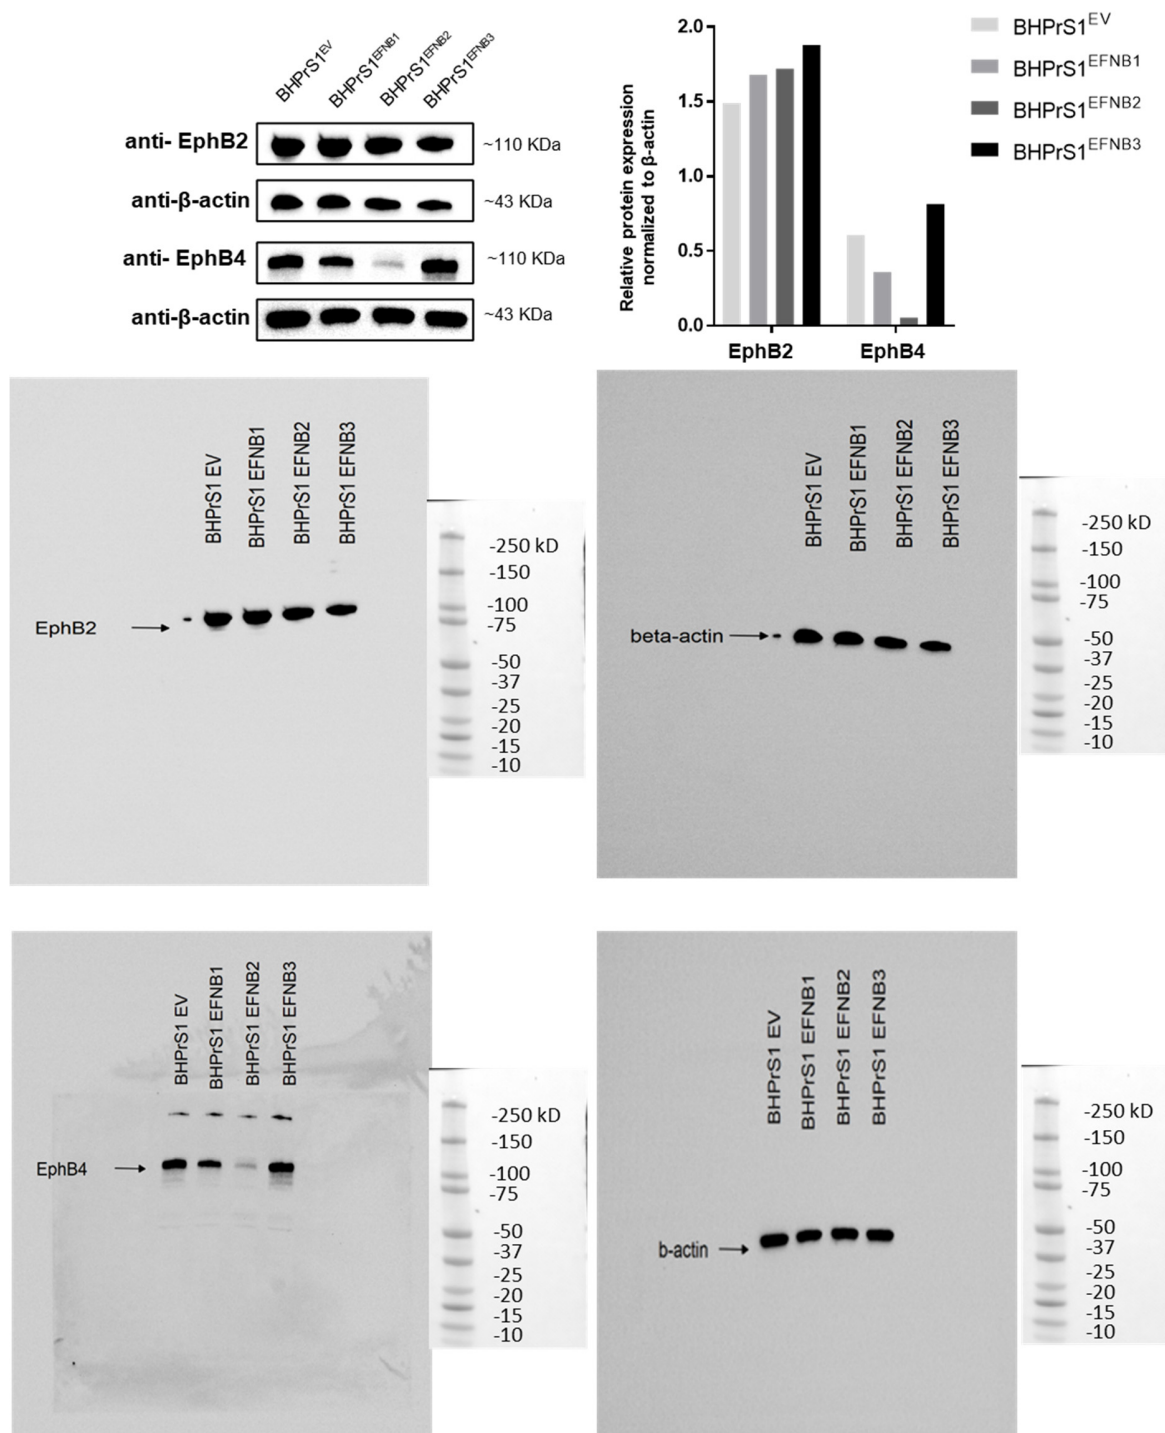

**Figure S7.** EphB2 and EphB4 expression in engineered BHPPrS1 cell lines. The protein levels of Ephrin receptors – EphB2 and EphB4 were evaluated in Ephrin-generated cell lines (BHPPrS1EFNB1, BHPPrS1EFNB2, BHPPrS1EFNB3) by western blot (Left). The bands were quantified and normalized to  $\beta$ -actin and presented as the mean of one biological experiment (Right). Corresponding original western blots were shown below.

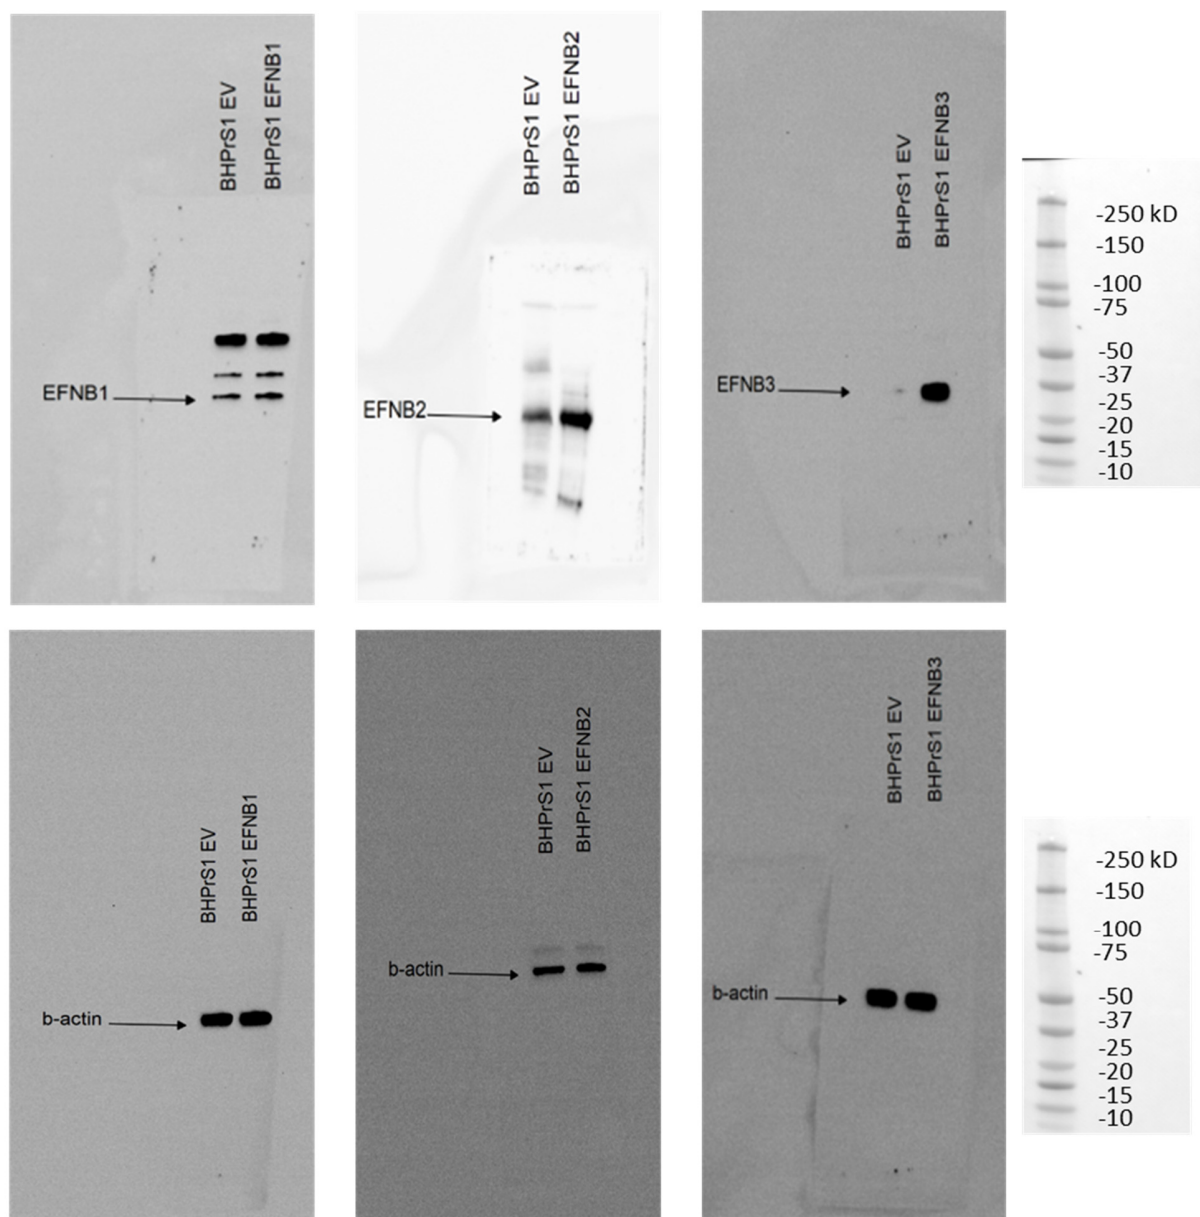

**Figure S8.** Uncropped western blots corresponding to Figure 2a and relative band intensities were shown.



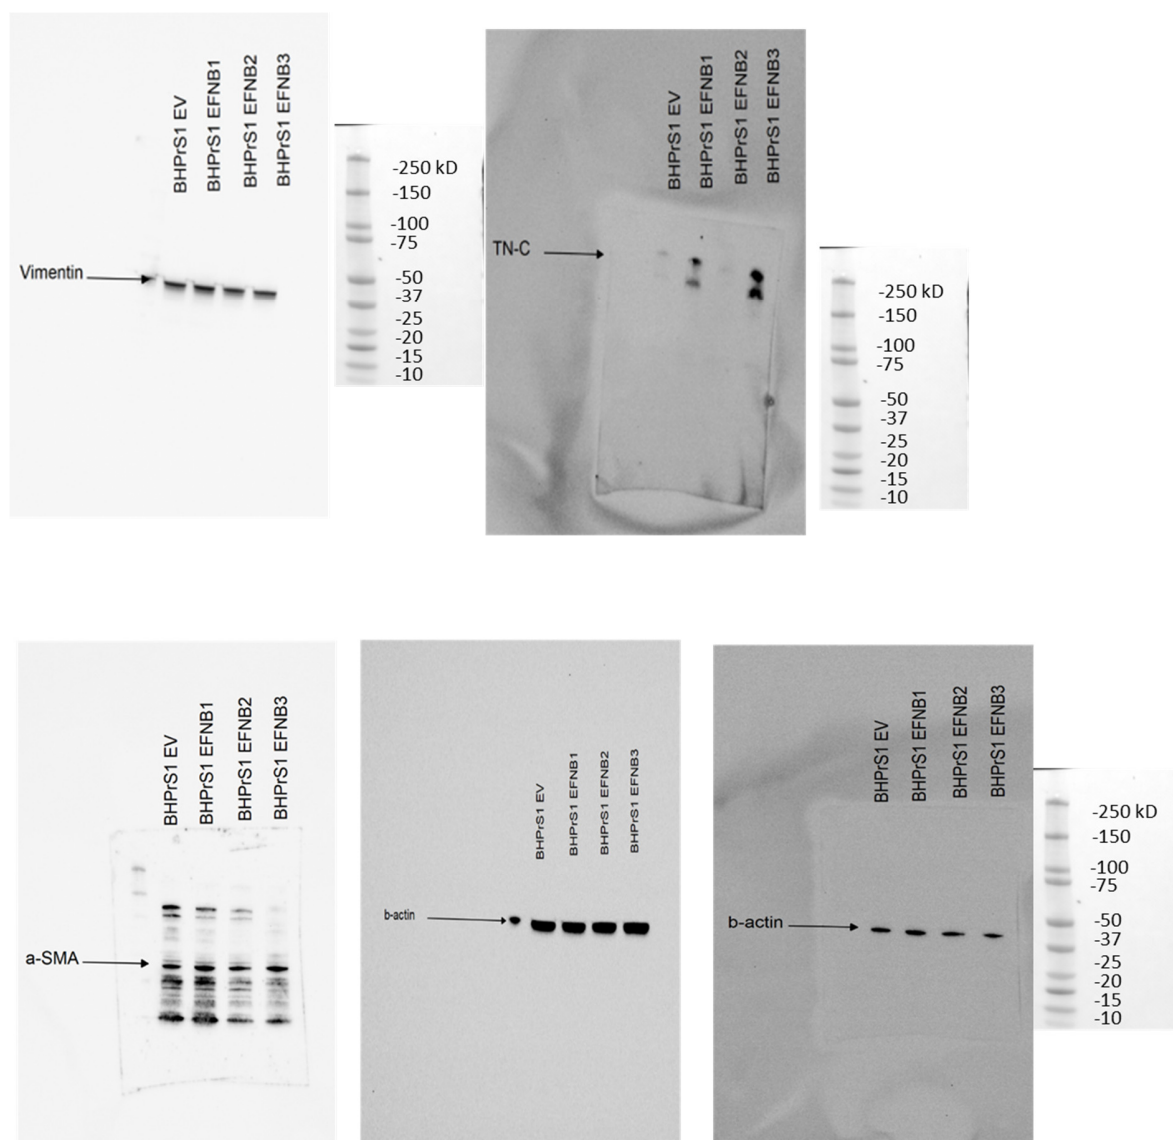

**Figure S9.** Uncropped western blots corresponding to Figure 2b and relative band intensities were shown.

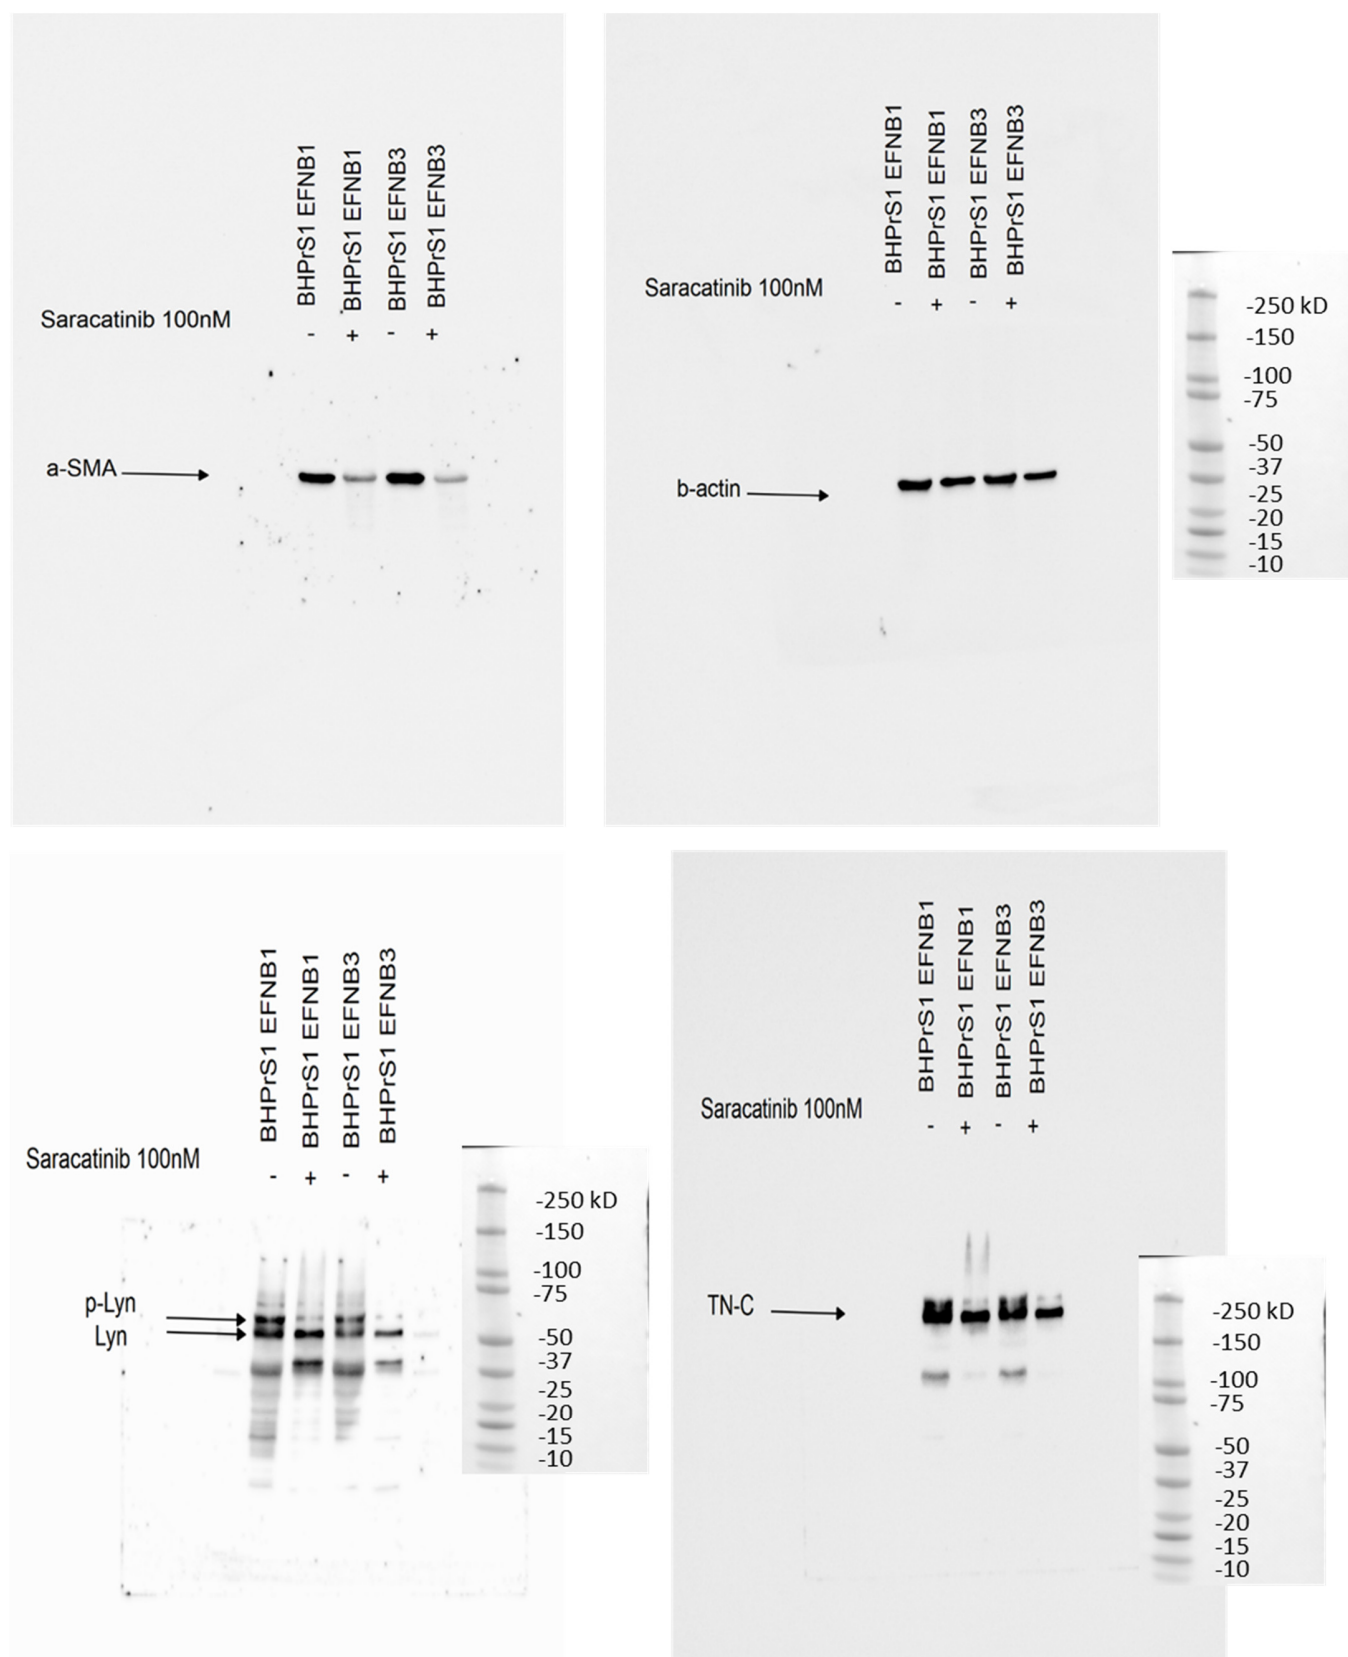

**Figure S10.** Uncropped western blots corresponding to Figure 6c and relative band intensities were shown.

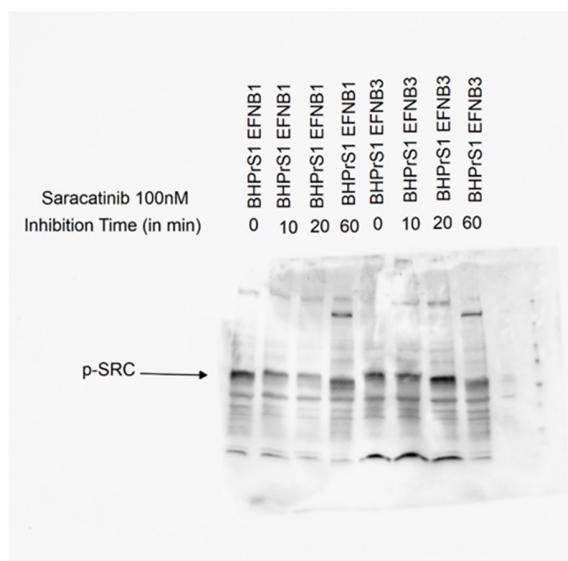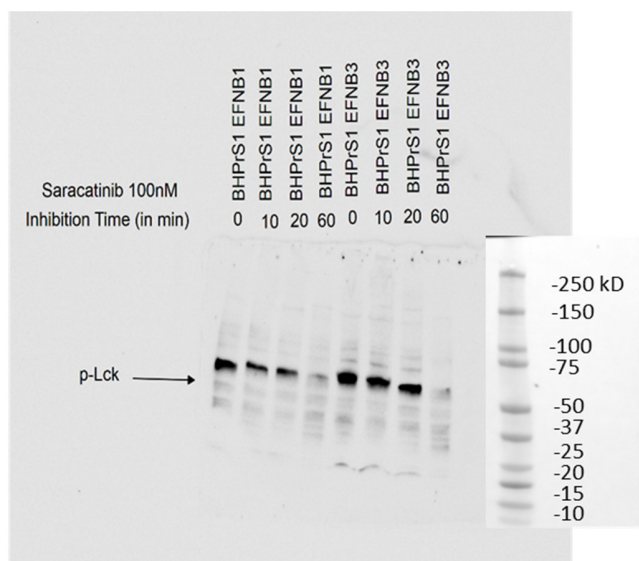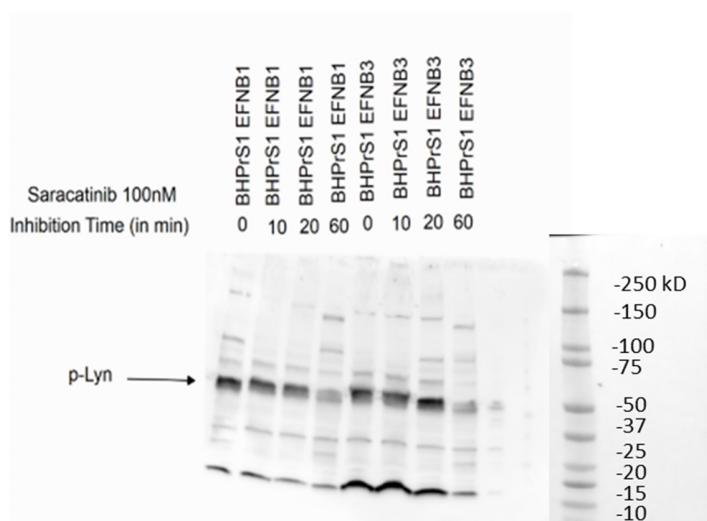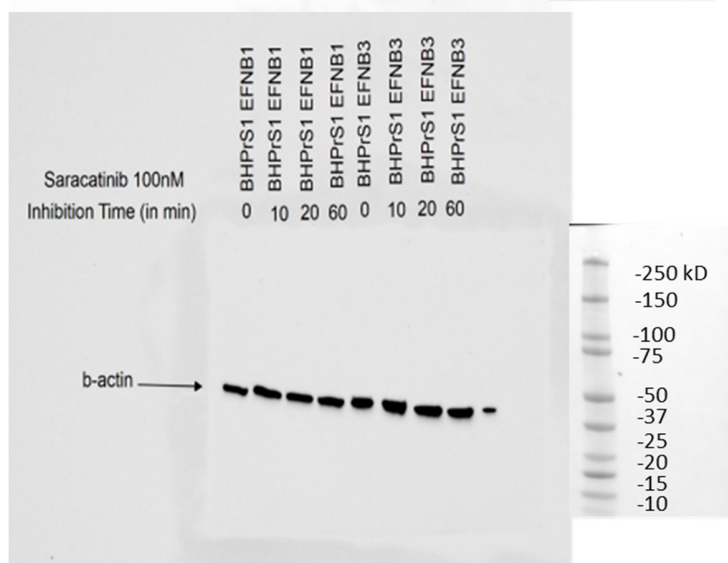

**Figure S11.** Uncropped western blots corresponding to Figure S5a and relative band intensities were shown.

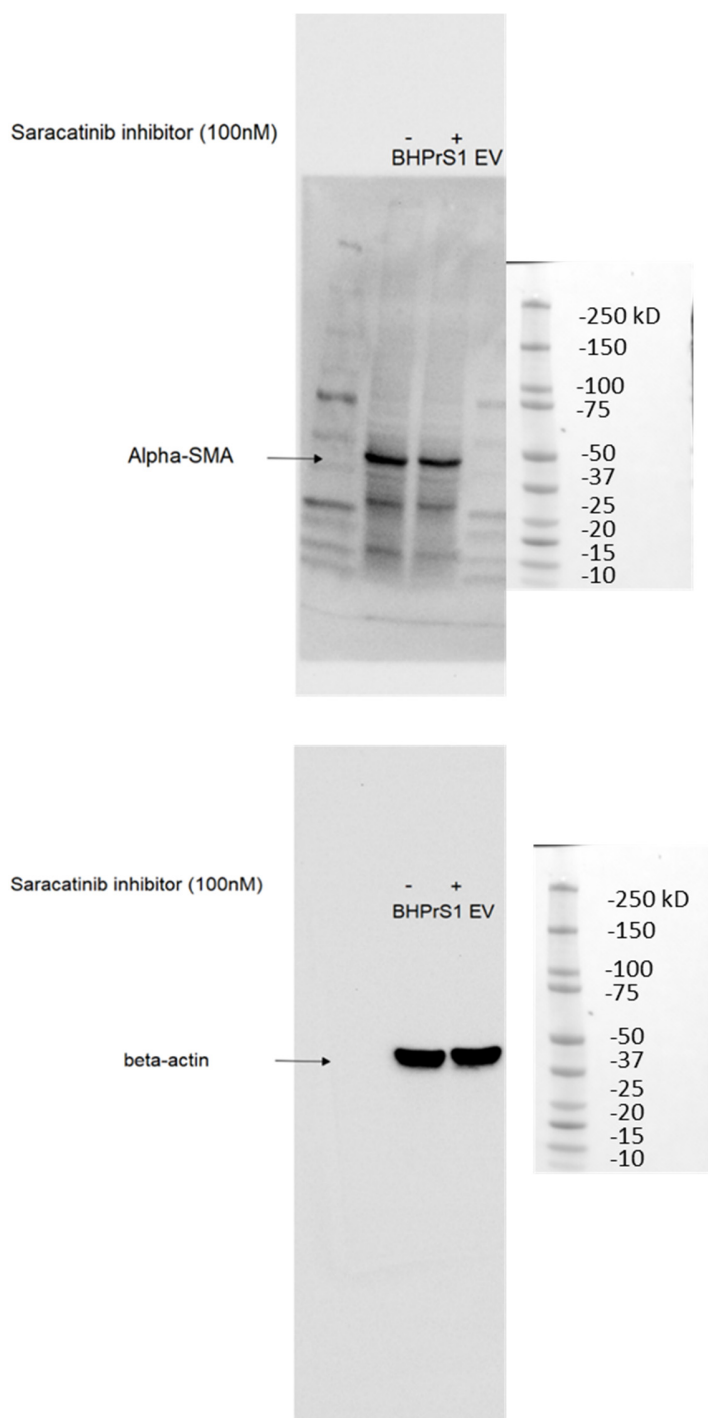

**Figure S12.** Uncropped western blots corresponding to Figure S5c and relative band intensities were shown.
